# Supplementary material
Source: publisher figshare collection journal article supplement (https://wellcome.figshare.com/articles/dataset/_/14039807)
Supplement: Supplementary file 4 [file 2]

## Appendix 2 – Phase 1 results tables and figures

### Appendix 2 Table 1: Bibliometric data

| Country                          | GDP<br>(million) | Pop.<br>(thousand) | Pubs.  | Cit.   | F-a<br>pubs. | F-a<br>cit. | 2008<br>pubs. | 2017<br>pubs. | Int.<br>Coll. | Nat.<br>Coll. | Inst.<br>Coll. | Single<br>author |
|----------------------------------|------------------|--------------------|--------|--------|--------------|-------------|---------------|---------------|---------------|---------------|----------------|------------------|
| Algeria                          | 159,049          | 40,606             | 8,043  | 57,188 | 6,473        | 28,931      | 437           | 1,138         | 52.7          | 10.1          | 34.4           | 2.7              |
| Angola                           | 95,335           | 28,813             | 446    | 4,827  | 120          | 489         | 21            | 85            | 92.5          | 0.3           | 7.2            | 0.0              |
| Benin                            | 8,583            | 10,872             | 2,427  | 22,042 | 1,166        | 7,435       | 161           | 290           | 80.7          | 1.0           | 17.8           | 0.6              |
| Botswana                         | 15,581           | 2,250              | 1,766  | 28,298 | 756          | 4,583       | 113           | 245           | 79.7          | 3.5           | 12.9           | 3.8              |
| Burkina Faso                     | 11,693           | 18,646             | 3,104  | 36,231 | 1,336        | 8,663       | 216           | 388           | 84.5          | 0.8           | 14.2           | 0.4              |
| Burundi                          | 3,007            | 10,524             | 243    | 2,250  | 67           | 311         | 6             | 40            | 87.4          | 0.0           | 11.4           | 1.2              |
| Cameroon                         | 32,218           | 23,439             | 5,973  | 69,384 | 3,356        | 21,499      | 376           | 814           | 73.7          | 7.5           | 17.0           | 1.8              |
| Cape Verde                       | 1,617            | 540                | 124    | 1,052  | 19           | 52          | 6             | 20            | 94.4          | 1.1           | 3.3            | 1.1              |
| Central African Republic         | 1,756            | 4,595              | 333    | 4,490  | 137          | 797         | 19            | 40            | 77.7          | 1.0           | 15.8           | 5.4              |
| Chad                             | 9,601            | 14,453             | 203    | 2,105  | 55           | 357         | 15            | 41            | 94.8          | 0.0           | 5.2            | 0.0              |
| Comoros                          | 617              | 796                | 61     | 419    | 13           | 33          | 2             | 7             | 77.8          | 2.8           | 19.4           | 0.0              |
| Democratic Republic of the Congo | 35,382           | 78,736             | 1,535  | 26,099 | 609          | 3,330       | 64            | 261           | 86.2          | 0.5           | 12.2           | 1.2              |
| Djibouti                         | 1,727            | 942                | 61     | 419    | 30           | 166         | 2             | 7             | 77.8          | 2.8           | 19.4           | 0.0              |
| Egypt                            | 332,791          | 95,689             | 60,693 | -      | -            | -           | 2,481         | 8,206         | 46.4          | 14.1          | 32.7           | 6.9              |
| Equatorial Guinea                | 10,685           | 1,221              | 114    | 1,714  | 12           | 43          | 6             | 12            | 100.0         | 0.0           | 0.0            | 0.0              |
| Eritrea                          | 2,608            | 4,475              | 154    | 1,252  | 54           | 176         | 15            | 18            | 83.3          | 0.0           | 14.6           | 2.1              |
| Ethiopia                         | 72,374           | 102,403            | 9,926  | 95,131 | 6,630        | 43,786      | 398           | 1,768         | 57.1          | 6.5           | 32.2           | 4.2              |
| Gabon                            | 14,214           | 1,980              | 1,203  | 20,122 | 446          | 6,199       | 84            | 141           | 89.5          | 0.0           | 9.3            | 1.1              |
| Gambia                           | 965              | 2,039              | 1,175  | 32,033 | 363          | 6,243       | 92            | 156           | 95.7          | 0.3           | 2.0            | 2.0              |
| Ghana                            | 42,690           | 28,207             | 7,005  | 96,341 | 3,681        | 19,958      | 307           | 1,118         | 68.7          | 5.1           | 22.6           | 3.6              |
| Guinea                           | 8,200            | 12,396             | 1,547  | 28,939 | 418          | 3,416       | 126           | 231           | 91.2          | 0.2           | 6.4            | 2.2              |
| Guinea-Bissau                    | 1,165            | 1,816              | 333    | 5,016  | 111          | 1,963       | 18            | 48            | 99.1          | 0.5           | 0.0            | 0.5              |
| Ivory Coast                      | 36,373           | 23,696             | 2,622  | 31,674 | 1,573        | 5,637       | 251           | 284           | 67.8          | 1.1           | 30.4           | 0.7              |

**Table 1:** Bibliometric data

| Country               | GDP<br>(million) | Pop.<br>(thousand) | Pubs.  | Cit.    | F-a<br>pubs. | F-a<br>cit. | 2008<br>pubs. | 2017<br>pubs. | Int.<br>Coll. | Nat.<br>Coll. | Inst.<br>Coll. | Single<br>author |
|-----------------------|------------------|--------------------|--------|---------|--------------|-------------|---------------|---------------|---------------|---------------|----------------|------------------|
| Kenya                 | 70,529           | 48,462             | 14,286 | 243,026 | 6,071        | 61,021      | 943           | 1,909         | 83.2          | 5.6           | 9.0            | 2.2              |
| Lesotho               | 2,291            | 2,204              | 186    | 2,581   | 64           | 478         | 14            | 22            | 88.6          | 0.0           | 9.5            | 1.9              |
| Liberia               | 2,101            | 4,614              | 258    | 3,733   | 45           | 296         | 7             | 57            | 92.8          | 1.4           | 3.4            | 2.4              |
| Libya                 | 34,699           | 6,293              | 1,513  | 14,307  | 735          | 3,379       | 77            | 151           | 81.3          | 0.2           | 14.9           | 3.5              |
| Madagascar            | 10,001           | 24,895             | 1,999  | 23,688  | 680          | 4,113       | 157           | 264           | 86.2          | 0.3           | 12.5           | 0.9              |
| Malawi                | 5,433            | 18,092             | 3,442  | 56,398  | 1,204        | 13,344      | 228           | 540           | 90.5          | 1.1           | 6.0            | 2.3              |
| Mali                  | 14,035           | 17,995             | 1,691  | 26,428  | 495          | 4,014       | 114           | 244           | 89.9          | 0.3           | 9.4            | 0.4              |
| Mauritania            | 4,739            | 4,301              | 227    | 1,719   | 83           | 400         | 13            | 32            | 90.9          | 0.0           | 8.4            | 0.7              |
| Mauritius             | 12,168           | 1,263              | 737    | 8,004   | 404          | 2,294       | 37            | 104           | 65.3          | 0.2           | 30.4           | 4.0              |
| Morocco               | 103,606          | 35,277             | 12,051 | 80,662  | 9,514        | 32,877      | 744           | 1,537         | 36.8          | 14.2          | 47.3           | 1.8              |
| Mozambique            | 11,015           | 28,829             | 1,731  | 39,885  | 542          | 5,014       | 81            | 290           | 93.4          | 1.2           | 3.8            | 1.6              |
| Namibia               | 10,948           | 2,480              | 1,026  | 10,156  | 337          | 1,386       | 44            | 154           | 83.9          | 0.4           | 8.3            | 7.4              |
| Niger                 | 7,528            | 20,673             | 804    | 9,075   | 278          | 1,808       | 56            | 99            | 84.7          | 1.3           | 12.4           | 1.7              |
| Nigeria               | 404,653          | 185,990            | 31,023 | 205,135 | 25,853       | 109,386     | 2,443         | 3,369         | 36.3          | 14.1          | 45.1           | 4.5              |
| Republic of the Congo | 7,834            | 5,126              | 921    | 11,026  | 351          | 1,496       | 50            | 102           | 80.9          | 0.3           | 17.1           | 1.6              |
| Rwanda                | 8,376            | 11,918             | 1,519  | 23,953  | 538          | 4,022       | 50            | 245           | 90.1          | 0.5           | 7.1            | 2.4              |
| Sao Tome and Principe | 343              | 200                | 25     | 335     | 4            | 56          | 0             | 7             | 100.0         | 0.0           | 0.0            | 0.0              |
| Senegal               | 14,684           | 15,412             | 3,667  | 37,424  | 1,759        | 10,138      | 234           | 473           | 73.1          | 4.5           | 21.1           | 1.3              |
| Seychelles            | 1,427            | 95                 | 339    | 5,631   | 57           | 567         | 31            | 44            | 83.0          | 0.5           | 4.5            | 2.0              |
| Sierra Leone          | 3,737            | 7,396              | 530    | 7,489   | 102          | 975         | 15            | 114           | 94.5          | 0.2           | 4.2            | 1.0              |
| Somalia               | 6,217            | 14,318             | 73     | 685     | 24           | 74          | 3             | 21            | 96.2          | 0.0           | 1.9            | 1.9              |
| South Africa          | 295,456          | 56,015             | 63,171 | -       | -            | -           | 4,210         | 8,325         | 57.2          | 10.6          | 26.3           | 5.9              |

**Table 1:** Bibliometric data

| Country   | GDP (million) | Pop.<br>(thousand) | Pubs.  | Cit.    | F-a<br>pubs. | F-a<br>cit. | 2008<br>pubs. | 2017<br>pubs. | Int.<br>Coll. | Nat.<br>Coll. | Inst.<br>Coll. | Single<br>author |
|-----------|---------------|--------------------|--------|---------|--------------|-------------|---------------|---------------|---------------|---------------|----------------|------------------|
| Sudan     | 95,584        | 39,579             | 3,620  | 46,793  | 1,949        | 10,599      | 214           | 442           | 76.2          | 0.1           | 20.1           | 3.6              |
| Swaziland | 3,721         | 1,343              | 542    | 5,871   | 199          | 1,727       | 31            | 92            | 86.8          | 0.7           | 7.9            | 4.6              |
| Tanzania  | 47,340        | 55,572             | 7,716  | 119,936 | 3,167        | 26,771      | 429           | 1,061         | 83.2          | 1.4           | 13.3           | 2.0              |
| Togo      | 4,400         | 7,606              | 924    | 6,331   | 562          | 1,739       | 51            | 107           | 65.2          | 0.0           | 34.5           | 0.3              |
| Tunisia   | 42,063        | 11,403             | 20,532 | 182,898 | 17,138       | 117,263     | 1,592         | 2,373         | 47.6          | 7.8           | 43.5           | 1.1              |
| Uganda    | 24,079        | 41,488             | 8,250  | 145,435 | 3,496        | 34,353      | 441           | 1,171         | 85.6          | 2.2           | 10.8           | 1.5              |
| Zambia    | 21,064        | 16,591             | 2,758  | 49,329  | 861          | 8,047       | 218           | 446           | 90.8          | 2.2           | 5.5            | 1.5              |
| Zimbabwe  | 16,620        | 16,150             | 3,005  | 45,515  | 1,320        | 9,604       | 205           | 469           | 75.2          | 1.8           | 19.6           | 3.4              |

Cit., citations; coll., collaboration; F-A, first-author; GDP, gross domestic product; inst., institutional; int., international; nat., national; pop., population; pubs., publications  
Collaboration figures are from SciVal and reflect outputs published in 2013-2017. All other data cover outputs published in 2008-2017.

**Appendix 2 Table 2: Clinical trial infrastructures and intellectual property rights**

|                                  | GDP<br>(million) | Pop.<br>(thousand) | Trials<br>(ICTRP) | Trials<br>per 1 mill. | Trials<br>(ct.gov) | Patent<br>apps | Patent apps<br>per 1 mill. |
|----------------------------------|------------------|--------------------|-------------------|-----------------------|--------------------|----------------|----------------------------|
| Algeria                          | 159,049          | 40,606             | 165               | 4.06                  | 95                 | 106            | 2.61                       |
| Angola                           | 95,335           | 28,813             | 16                | 0.56                  | 3                  | -              | -                          |
| Benin                            | 8,583            | 10,872             | 54                | 4.97                  | 38                 | -              | -                          |
| Botswana                         | 15,581           | 2,250              | 93                | 41.33                 | 64                 | 1              | 0.44                       |
| Burkina Faso                     | 11,693           | 18,646             | 186               | 9.98                  | 126                | 2              | 0.11                       |
| Burundi                          | 3,007            | 10,524             | 19                | 1.81                  | 11                 | -              | -                          |
| Cameroon                         | 32,218           | 23,439             | 113               | 4.82                  | 68                 | -              | -                          |
| Cape Verde                       | 1,617            | 540                | 0                 | 0.00                  | 0                  | -              | -                          |
| Central African Republic         | 1,756            | 4,595              | 13                | 2.83                  | 6                  | -              | -                          |
| Chad                             | 9,601            | 14,453             | 12                | 0.83                  | 7                  | -              | -                          |
| Comoros                          | 617              | 796                | 3                 | 3.77                  | 1                  | -              | -                          |
| Democratic Republic of the Congo | 35,382           | 78,736             | 87                | 1.10                  | 55                 | -              | -                          |
| Djibouti                         | 1,727            | 942                | 4                 | 4.24                  | 1                  | 1              | 1.06                       |
| Egypt                            | 332,791          | 95,689             | 3,711             | 38.78                 | 2,409              | 918            | 9.59                       |
| Equatorial Guinea                | 10,685           | 1,221              | 6                 | 4.91                  | 3                  | -              | -                          |
| Eritrea                          | 2,608            | 4,475              | 6                 | 1.34                  | 0                  | -              | -                          |
| Ethiopia                         | 72,374           | 102,403            | 188               | 1.84                  | 124                | 12             | 0.12                       |
| Gabon                            | 14,214           | 1,980              | 63                | 31.82                 | 44                 | -              | -                          |
| Gambia                           | 965              | 2,039              | 119               | 58.38                 | 67                 | -              | -                          |
| Ghana                            | 42,690           | 28,207             | 238               | 8.44                  | 137                | 14             | 0.50                       |
| Guinea                           | 8,200            | 12,396             | 31                | 2.50                  | 20                 | -              | -                          |
| Guinea-Bissau                    | 1,165            | 1,816              | 62                | 34.15                 | 51                 | -              | -                          |
| Ivory Coast                      | 36,373           | 23,696             | 72                | 3.04                  | 39                 | 26             | 1.10                       |

**Table 2:** Clinical trial infrastructures and intellectual property rights

|                       | GDP<br>(million) | Pop.<br>(thousand) | Trials<br>(ICTRP) | Trials<br>per 1 mill. | Trials<br>(ct.gov) | Patent<br>apps | Patent apps<br>per 1 mill. |
|-----------------------|------------------|--------------------|-------------------|-----------------------|--------------------|----------------|----------------------------|
| Kenya                 | 70,529           | 48,462             | 639               | 13.19                 | 417                | 144            | 2.97                       |
| Lesotho               | 2,291            | 2,204              | 22                | 9.98                  | 16                 | -              | -                          |
| Liberia               | 2,101            | 4,614              | 25                | 5.42                  | 16                 | -              | -                          |
| Libya                 | 34,699           | 6,293              | 19                | 3.02                  | 6                  | -              | -                          |
| Madagascar            | 10,001           | 24,895             | 27                | 1.08                  | 15                 | 6              | 0.24                       |
| Malawi                | 5,433            | 18,092             | 317               | 17.52                 | 201                | 3              | 0.17                       |
| Mali                  | 14,035           | 17,995             | 170               | 9.45                  | 128                | -              | -                          |
| Mauritania            | 4,739            | 4,301              | 10                | 2.33                  | 1                  | -              | -                          |
| Mauritius             | 12,168           | 1,263              | 34                | 26.91                 | 20                 | 2              | 1.58                       |
| Morocco               | 103,606          | 35,277             | 191               | 5.41                  | 96                 | 237            | 6.72                       |
| Mozambique            | 11,015           | 28,829             | 97                | 3.36                  | 68                 | 15             | 0.52                       |
| Namibia               | 10,948           | 2,480              | 7                 | 2.82                  | 3                  | -              | -                          |
| Niger                 | 7,528            | 20,673             | 34                | 1.64                  | 26                 | -              | -                          |
| Nigeria               | 404,653          | 185,990            | 342               | 1.84                  | 139                | 50             | 0.27                       |
| Republic of the Congo | 7,834            | 5,126              | 52                | 10.14                 | 37                 | -              | -                          |
| Rwanda                | 8,376            | 11,918             | 97                | 8.14                  | 71                 | 2              | 0.17                       |
| Sao Tome and Principe | 343              | 200                | 2                 | 10.00                 | 0                  | -              | -                          |
| Senegal               | 14,684           | 15,412             | 103               | 6.68                  | 75                 | -              | -                          |
| Seychelles            | 1,427            | 95                 | 3                 | 31.69                 | 1                  | -              | -                          |
| Sierra Leone          | 3,737            | 7,396              | 39                | 5.27                  | 17                 | -              | -                          |
| Somalia               | 6,217            | 14,318             | 14                | 0.98                  | 0                  | -              | -                          |
| South Africa          | 295,456          | 56,015             | 4,341             | 77.50                 | 2,505              | 2,783          | 49.68                      |
| South Sudan           | 9,015            | 12,231             | 2                 | 0.16                  | 0                  | -              | -                          |

**Table 2:** Clinical trial infrastructures and intellectual property rights

|           | GDP<br>(million) | Pop.<br>(thousand) | Trials<br>(ICTRP) | Trials<br>per 1 mill. | Trials<br>(ct.gov) | Patent<br>apps | Patent apps<br>per 1 mill. |
|-----------|------------------|--------------------|-------------------|-----------------------|--------------------|----------------|----------------------------|
| Sudan     | 95,584           | 39,579             | 71                | 1.79                  | 34                 | 284            | 7.18                       |
| Swaziland | 3,721            | 1,343              | 22                | 16.38                 | 13                 | -              | -                          |
| Tanzania  | 47,340           | 55,572             | 433               | 7.79                  | 290                | 1              | 0.02                       |
| Togo      | 4,400            | 7,606              | 16                | 2.10                  | 8                  | -              | -                          |
| Tunisia   | 42,063           | 11,403             | 426               | 37.36                 | 255                | 235            | 20.61                      |
| Uganda    | 24,079           | 41,488             | 651               | 15.69                 | 447                | 16             | 0.39                       |
| Zambia    | 21,064           | 16,591             | 262               | 15.79                 | 171                | 14             | 0.84                       |
| Zimbabwe  | 16,620           | 16,150             | 190               | 11.76                 | 111                | 8              | 0.50                       |

Apps, applications; GDP, gross domestic product; ICTRP, International Clinical Trials Registry Platform.

**Appendix 2 Table 3: R&D personnel**

|                                  | GDP<br>(million) | Pop.<br>(thousand) | R&D staff<br>per mill. | Researchers<br>per mill. | Researchers<br>(% M&HS) | Researchers<br>(% PhD) |
|----------------------------------|------------------|--------------------|------------------------|--------------------------|-------------------------|------------------------|
| Algeria                          | 159,049          | 40,606             | 220.23                 | 168.02                   | 6.87                    | 16.22                  |
| Angola                           | 95,335           | 28,813             | 84.15                  | 47.48                    |                         | 20.09                  |
| Benin                            | 8,583            | 10,872             | -                      | -                        | -                       | -                      |
| Botswana                         | 15,581           | 2,250              | 570.35                 | 179.47                   | 18.31                   | 29.37                  |
| Burkina Faso                     | 11,693           | 18,646             | 131.33                 | 47.58                    | 46.37                   | 41.85                  |
| Burundi                          | 3,007            | 10,524             | -                      | -                        | -                       | -                      |
| Cameroon                         | 32,218           | 23,439             | -                      | -                        | -                       | -                      |
| Cape Verde                       | 1,617            | 540                | 72.83                  | 49.21                    | 0.00                    | 72.00                  |
| Central African Republic         | 1,756            | 4,595              | -                      | -                        | -                       | -                      |
| Chad                             | 9,601            | 14,453             | 75.90                  | 58.33                    | 6.49                    | 29.72                  |
| Comoros                          | 617              | 796                | -                      | -                        | -                       | -                      |
| Democratic Republic of the Congo | 35,382           | 78,736             | 19.45                  | 7.23                     | 7.68                    | 11.95                  |
| Djibouti                         | 1,727            | 942                | -                      | -                        | -                       | -                      |
| Egypt                            | 332,791          | 95,689             | 1,208.51               | 680.30                   | 29.80                   | 55.86                  |
| Equatorial Guinea                | 10,685           | 1,221              | -                      | -                        | -                       | -                      |
| Eritrea                          | 2,608            | 4,475              | -                      | -                        | -                       | -                      |
| Ethiopia                         | 72,374           | 102,403            | 121.21                 | 44.97                    | 12.98                   | 16.66                  |
| Gabon                            | 14,214           | 1,980              | -                      | -                        | -                       | -                      |
| Gambia                           | 965              | 2,039              | 603.31                 | 33.56                    | 40.96                   | 55.63                  |
| Ghana                            | 42,690           | 28,207             | 122.57                 | 38.37                    | 14.40                   | 34.39                  |
| Guinea                           | 8,200            | 12,396             | -                      | -                        | -                       | -                      |
| Guinea-Bissau                    | 1,165            | 1,816              | -                      | -                        | -                       | -                      |
| Ivory Coast                      | 36,373           | 23,696             | -                      | 69.21                    | -                       | -                      |

**Table 3: R&D personnel**

| Country               | GDP<br>(million) | Pop.<br>(thousand) | R&D staff<br>per mill. | Researchers<br>per mill. | Researchers<br>(% M&HS) | Researchers<br>(% PhD) |
|-----------------------|------------------|--------------------|------------------------|--------------------------|-------------------------|------------------------|
| Kenya                 | 70,529           | 48,462             | 1,029.40               | 225.03                   | 25.82                   | 6.07                   |
| Lesotho               | 2,291            | 2,204              | 32.90                  | 22.83                    | 0.00                    | 28.06                  |
| Liberia               | 2,101            | 4,614              | -                      | -                        | -                       | -                      |
| Libya                 | 34,699           | 6,293              | -                      | -                        | -                       | -                      |
| Madagascar            | 10,001           | 24,895             | 113.00                 | 24.70                    | 13.17                   | 46.99                  |
| Malawi                | 5,433            | 18,092             | 113.44                 | 48.27                    | 18.99                   | 9.89                   |
| Mali                  | 14,035           | 17,995             | 73.45                  | 30.79                    | 11.25                   | 61.79                  |
| Mauritania            | 4,739            | 4,301              | -                      | -                        | -                       | -                      |
| Mauritius             | 12,168           | 1,263              | 500.18                 | 181.83                   | 6.59                    | 27.58                  |
| Morocco               | 103,606          | 35,277             | 1,149.30               | 1,068.96                 | 9.22                    | 16.24                  |
| Mozambique            | 11,015           | 28,829             | 82.83                  | 41.48                    | 11.65                   | 13.99                  |
| Namibia               | 10,948           | 2,480              | 235.68                 | 143.32                   | 3.47                    | 21.76                  |
| Niger                 | 7,528            | 20,673             | 43.69                  | 7.42                     | -                       | -                      |
| Nigeria               | 404,653          | 185,990            | 77.38                  | 38.77                    | -                       | 34.11                  |
| Republic of the Congo | 7,834            | 5,126              | 67.27                  | 31.54                    | -                       | -                      |
| Rwanda                | 8,376            | 11,918             | -                      | 12.35                    | -                       | 37.66                  |
| Sao Tome and Principe | 343              | 200                | -                      | -                        | -                       | -                      |
| Senegal               | 14,684           | 15,412             | 622.86                 | 549.32                   | 14.07                   | 38.68                  |
| Seychelles            | 1,427            | 95                 | 2,028.31               | 146.49                   |                         | 15.38                  |
| Sierra Leone          | 3,737            | 7,396              | -                      | -                        | -                       | -                      |
| Somalia               | 6,217            | 14,318             | -                      | -                        | -                       | -                      |
| South Africa          | 295,456          | 56,015             | 742.51                 | 473.12                   |                         | 35.22                  |
| South Sudan           | 9,015            | 12,231             | -                      | -                        | -                       | -                      |



**Table 3: R&D personnel**

| Country   | GDP       | Pop.       | R&D staff | Researchers | Researchers | Researchers |
|-----------|-----------|------------|-----------|-------------|-------------|-------------|
|           | (million) | (thousand) | per mill. | per mill.   | (% M&HS)    | (% PhD)     |
| Sudan     | 95,584    | 39,579     | -         | -           | -           | -           |
| Swaziland | 3,721     | 1,343      | 308.97    | 119.14      | 33.93       | 24.98       |
| Tanzania  | 47,340    | 55,572     | 38.84     | 18.34       | -           | 32.78       |
| Togo      | 4,400     | 7,606      | 42.42     | 31.77       | 16.11       | 68.88       |
| Tunisia   | 42,063    | 11,403     | 2,068.71  | 1,964.97    | -           | 35.07       |
| Uganda    | 24,079    | 41,488     | 41.54     | 26.47       | 19.55       | 30.51       |
| Zambia    | 21,064    | 16,591     | 162.81    | 40.97       | -           | -           |
| Zimbabwe  | 16,620    | 16,150     | 118.34    | 88.72       | 0.23        | 13.45       |

GDP, gross domestic product; M&HS, medical and health sciences; mill., million; pop., population; PhD, doctor of philosophy; R&D, research and development.

All data are from 2016 or most recent year available.

**Appendix 2 Table 4: R&D expenditure**

| Country                          | GDP<br>(million) | Pop.<br>(thousand) | GERD         | GERD<br>(% GDP) | GERD<br>per capita | GERD<br>(M&HS) | GERD<br>per researcher | GERD<br>(M&HS %) |
|----------------------------------|------------------|--------------------|--------------|-----------------|--------------------|----------------|------------------------|------------------|
| Algeria                          | 159,049          | 40,606             | 241,204.78   | 0.07            | 7.25               | -              | 43.13                  | -                |
| Angola                           | 95,335           | 28,813             | -            | -               | -                  | -              | -                      | -                |
| Benin                            | 8,583            | 10,872             | -            | -               | -                  | -              | -                      | -                |
| Botswana                         | 15,581           | 2,250              | 184,247.17   | 0.54            | 86.56              | 23,143.69      | 482.32                 | 30.04            |
| Burkina Faso                     | 11,693           | 18,646             | 65,025.67    | 0.22            | 3.70               | 2,910.88       | -                      | 4.48             |
| Burundi                          | 3,007            | 10,524             | 8,460.33     | 0.12            | 0.94               | -              | -                      | -                |
| Cameroon                         | 32,218           | 23,439             | -            | -               | -                  | -              | -                      | -                |
| Cape Verde                       | 1,617            | 540                | 2,211.43     | 0.07            | 4.35               | -              | 88.46                  | -                |
| Central African Republic         | 1,756            | 4,595              | -            | -               | -                  | -              | -                      | -                |
| Chad                             | 9,601            | 14,453             | 91,046.10    | 0.32            | 6.30               | 14,722.82      | 108.00                 | 16.17            |
| Comoros                          | 617              | 796                | -            | -               | -                  | -              | -                      | -                |
| Democratic Republic of the Congo | 35,382           | 78,736             | 10,234.03    | 0.02            | 0.13               | -              | 18.58                  | -                |
| Djibouti                         | 1,727            | 942                | -            | -               | -                  | -              | -                      | -                |
| Egypt                            | 332,791          | 95,689             | 7,562,293.01 | 0.71            | 79.03              | -              | 116.17                 | -                |
| Equatorial Guinea                | 10,685           | 1,221              | -            | -               | -                  | -              | -                      | -                |
| Eritrea                          | 2,608            | 4,475              | -            | -               | -                  | -              | -                      | -                |
| Ethiopia                         | 72,374           | 102,403            | 787,274.45   | 0.60            | 8.30               | 34,522.66      | 184.52                 | 15.50            |
| Gabon                            | 14,214           | 1,980              | 131,865.44   | 0.58            | 83.10              | -              | -                      | -                |
| Gambia                           | 965              | 2,039              | 3,543.77     | 0.13            | 2.03               | -              | 60.47                  | -                |
| Ghana                            | 42,690           | 28,207             | 276,671.79   | 0.38            | 11.29              | -              | 294.14                 | -                |
| Guinea                           | 8,200            | 12,396             | -            | -               | -                  | -              | -                      | -                |
| Guinea-Bissau                    | 1,165            | 1,816              | -            | -               | -                  | -              | -                      | -                |
| Ivory Coast                      | 36,373           | 23,696             | -            | -               | -                  | -              | -                      | -                |

**Table 4: R&D expenditure**

| Country               | GDP<br>(million) | Pop.<br>(thousand) | GERD         | GERD<br>(% GDP) | GERD<br>per capita | GERD<br>(M&HS) | GERD<br>per researcher | GERD<br>(M&HS %) |
|-----------------------|------------------|--------------------|--------------|-----------------|--------------------|----------------|------------------------|------------------|
| Kenya                 | 70,529           | 48,462             | 788,176.89   | 0.79            | 19.06              | 216,530.58     | 84.70                  | 27.47            |
| Lesotho               | 2,291            | 2,204              | 3,018.33     | 0.05            | 1.39               | 0.00           | 60.79                  | 0.00             |
| Liberia               | 2,101            | 4,614              | -            | -               | -                  | -              | -                      | -                |
| Libya                 | 34,699           | 6,293              | -            | -               | -                  | -              | -                      | -                |
| Madagascar            | 10,001           | 24,895             | 5,626.29     | 0.01            | 0.23               | 768.68         | 9.15                   | 13.66            |
| Malawi                | 5,433            | 18,092             |              |                 |                    |                |                        |                  |
| Mali                  | 14,035           | 17,995             | 112,531.28   | 0.31            | 6.44               | 9,256.23       | 209.22                 | 8.23             |
| Mauritania            | 4,739            | 4,301              | -            | -               | -                  | -              | -                      | -                |
| Mauritius             | 12,168           | 1,263              | 38,856.48    | 0.18            | 31.00              | 1,714.62       | 170.50                 | 4.41             |
| Morocco               | 103,606          | 35,277             | 1,483,610.29 | 0.71            | 45.78              |                | 63.73                  |                  |
| Mozambique            | 11,015           | 28,829             | 112,790.11   | 0.34            | 4.03               | 32,234.22      | 97.08                  | 28.58            |
| Namibia               | 10,948           | 2,480              | 81,658.45    | 0.34            | 34.44              | 1,585.30       | 240.31                 | 1.94             |
| Niger                 | 7,528            | 20,673             | -            | -               | -                  | -              | -                      | -                |
| Nigeria               | 404,653          | 185,990            | 1,374,848.32 | 0.22            | 9.39               | 142,133.56     | 242.20                 | 10.34            |
| Republic of the Congo | 7,834            | 5,126              | -            | -               | -                  | -              | -                      | -                |
| Rwanda                | 8,376            | 11,918             | -            | -               | -                  | -              | -                      | -                |
| Sao Tome and Principe | 343              | 200                | -            | -               | -                  | -              | -                      | -                |
| Senegal               | 14,684           | 15,412             | 275,579.68   | 0.75            | 18.40              | -              | 33.50                  | -                |
| Seychelles            | 1,427            | 95                 | 5,961.26     | 0.22            | 63.26              | -              | 305.37                 | -                |
| Sierra Leone          | 3,737            | 7,396              | -            | -               | -                  | -              | -                      | -                |
| Somalia               | 6,217            | 14,318             | -            | -               | -                  | -              | -                      | -                |
| South Africa          | 295,456          | 56,015             | 5,823,288.67 | 0.80            | 105.32             | 905,563.36     | 222.61                 | 18.19            |
| South Sudan           | 9,015            | 12,231             | -            | -               | -                  | -              | -                      | -                |

**Table 4: R&D expenditure**

| Country   | GDP<br>(million) | Pop.<br>(thousand) | GERD       | GERD<br>(% GDP) | GERD<br>per capita | GERD<br>(M&HS) | GERD<br>per researcher | GERD<br>(M&HS %) |
|-----------|------------------|--------------------|------------|-----------------|--------------------|----------------|------------------------|------------------|
| Sudan     | 95,584           | 39,579             | 281,296.26 | 0.30            | 9.10               | -              | -                      | -                |
| Swaziland | 3,721            | 1,343              | 29,493.90  | 0.27            | 22.36              | 8,923.15       | 187.68                 | 30.25            |
| Tanzania  | 47,340           | 55,572             | 623,754.21 | 0.53            | 12.32              | -              | 671.75                 | -                |
| Togo      | 4,400            | 7,606              | 27,209.82  | 0.27            | 3.76               | 4,317.74       | 100.19                 | 15.87            |
| Tunisia   | 42,063           | 11,403             | 794,749.43 | 0.60            | 69.70              | -              | 35.47                  | -                |
| Uganda    | 24,079           | 41,488             | 114,149.62 | 0.17            | 2.94               | 14,811.03      | 111.06                 | 12.98            |
| Zambia    | 21,064           | 16,591             | 100,756.29 | 0.28            | 7.70               | -              | 187.98                 | -                |
| Zimbabwe  | 16,620           | 16,150             | -          | -               | -                  | -              | -                      | -                |

GERD, gross expenditure on research and development; GDP, gross domestic product; M&HS, medical and health sciences; pop., population; PhD, doctor of philosophy; R&D, research and development.

All data are from 2016 or most recent year available.

**Appendix 2 Table 5: Regulatory capacities**

| Country                          | GDP<br>(million) | Pop.<br>(thousand) | Organizations | Legislation | Regulations | Guidelines | NPHI | NEC | IRBs |
|----------------------------------|------------------|--------------------|---------------|-------------|-------------|------------|------|-----|------|
| Algeria                          | 159,049          | 40,606             | 1             | 0           | 2           | 0          | -    | Y   | 1    |
| Angola                           | 95,335           | 28,813             | -             | -           | -           | -          | Y    | -   | 0    |
| Benin                            | 8,583            | 10,872             | 0             | 1           | 0           | 0          | -    | Y   | 3    |
| Botswana                         | 15,581           | 2,250              | 3             | 2           | 1           | 5          | -    | Y   | 4    |
| Burkina Faso                     | 11,693           | 18,646             | 1             | 0           | 2           | 0          | -    | Y   | 4    |
| Burundi                          | 3,007            | 10,524             | -             | -           | -           | -          | Y    | -   | 0    |
| Cameroon                         | 32,218           | 23,439             | 1             | 0           | 1           | 1          | Y    | -   | 8    |
| Cape Verde                       | 1,617            | 540                | -             | -           | -           | -          | Y    | Y   | 0    |
| Central African Republic         | 1,756            | 4,595              | -             | -           | -           | -          | -    | -   | 1    |
| Chad                             | 9,601            | 14,453             | -             | -           | -           | -          | -    | -   | 0    |
| Comoros                          | 617              | 796                | -             | -           | -           | -          | -    | -   | 0    |
| Democratic Republic of the Congo | 35,382           | 78,736             | 0             | 1           | 0           | 0          | -    | Y   | 4    |
| Djibouti                         | 1,727            | 942                | -             | -           | -           | -          | -    | -   | 0    |
| Egypt                            | 332,791          | 95,689             | 2             | 1           | 1           | 0          | -    | Y   | 23   |
| Equatorial Guinea                | 10,685           | 1,221              | -             | -           | -           | -          | -    | -   | 0    |
| Eritrea                          | 2,608            | 4,475              | -             | -           | -           | -          | -    | -   | 0    |
| Ethiopia                         | 72,374           | 102,403            | 3             | 1           | 1           | 2          | Y    | Y   | 7    |
| Gabon                            | 14,214           | 1,980              | -             | -           | -           | -          | -    | Y   | 1    |
| Gambia                           | 965              | 2,039              | 1             | 0           | 0           | 1          | -    | Y   | 1    |
| Ghana                            | 42,690           | 28,207             | 1             | 1           | 1           | 4          | Y    | Y   | 3    |
| Guinea                           | 8,200            | 12,396             | 2             | 2           | 1           | 1          | Y    | -   | 0    |
| Guinea-Bissau                    | 1,165            | 1,816              | -             | -           | -           | -          | Y    | -   | 0    |
| Ivory Coast                      | 36,373           | 23,696             | 1             | 0           | 1           | 0          | Y    | Y   | 1    |

**Table 5:** Regulatory capacities

| Country               | GDP<br>(million) | Pop.<br>(thousand) | Organizations | Legislation | Regulations | Guidelines | NPHI | NEC | IRBs |
|-----------------------|------------------|--------------------|---------------|-------------|-------------|------------|------|-----|------|
| Kenya                 | 70,529           | 48,462             | 4             | 3           | 2           | 2          | Y    | -   | 4    |
| Lesotho               | 2,291            | 2,204              | -             | -           | -           | -          | -    | -   | 1    |
| Liberia               | 2,101            | 4,614              | 2             | 0           | 2           | 1          | Y    | -   | 2    |
| Libya                 | 34,699           | 6,293              | -             | -           | -           | -          | Y    | -   | 1    |
| Madagascar            | 10,001           | 24,895             | 0             | 1           | 0           | 0          | Y    | Y   | 2    |
| Malawi                | 5,433            | 18,092             | 8             | 5           | 2           | 8          | Y    | Y   | 2    |
| Mali                  | 14,035           | 17,995             | 1             | 1           | 0           | 0          | -    | Y   | 1    |
| Mauritania            | 4,739            | 4,301              | -             | -           | -           | -          | -    | -   | 0    |
| Mauritius             | 12,168           | 1,263              | -             | -           | -           | -          | -    | Y   | 2    |
| Morocco               | 103,606          | 35,277             | -             | -           | -           | -          | Y    | -   | 2    |
| Mozambique            | 11,015           | 28,829             | 0             | 0           | 0           | 1          | Y    | -   | 0    |
| Namibia               | 10,948           | 2,480              | -             | -           | -           | -          | -    | -   | 1    |
| Niger                 | 7,528            | 20,673             | -             | -           | -           | -          | -    | -   | 1    |
| Nigeria               | 404,653          | 185,990            | 5             | 2           | 0           | 6          | Y    | Y   | 26   |
| Republic of the Congo | 7,834            | 5,126              | -             | -           | -           | -          | -    | Y   | 2    |
| Rwanda                | 8,376            | 11,918             | 1             | 0           | 0           | 1          | Y    | Y   | 3    |
| Sao Tome and Principe | 343              | 200                | -             | -           | -           | -          | Y    | -   | 0    |
| Senegal               | 14,684           | 15,412             | 1             | 1           | 0           | 0          | -    | Y   | 2    |
| Seychelles            | 1,427            | 95                 | -             | -           | -           | -          | -    | -   | 0    |
| Sierra Leone          | 3,737            | 7,396              | 3             | 0           | 3           | 3          | Y    | -   | 0    |
| Somalia               | 6,217            | 14,318             | -             | -           | -           | -          | Y    | -   | 0    |
| South Africa          | 295,456          | 56,015             | 11            | 5           | 7           | 9          | Y    | Y   | 30   |
| South Sudan           | 9,015            | 12,231             | -             | -           | -           | -          | -    | -   | 0    |

**Table 5:** Regulatory capacities

| Country   | GDP<br>(million) | Pop.<br>(thousand) | Organizations | Legislation | Regulations | Guidelines | NPHI | NEC | IRBs |
|-----------|------------------|--------------------|---------------|-------------|-------------|------------|------|-----|------|
| Sudan     | 95,584           | 39,579             | 5             | 3           | 0           | 4          | Y    | Y   | 7    |
| Swaziland | 3,721            | 1,343              | -             | -           | -           | -          | -    | -   | 0    |
| Tanzania  | 47,340           | 55,572             | 5             | 5           | 3           | 3          | Y    | -   | 5    |
| Togo      | 4,400            | 7,606              | 2             | 0           | 1           | 2          | Y    | Y   | 1    |
| Tunisia   | 42,063           | 11,403             | -             | -           | -           | -          | -    | Y   | 2    |
| Uganda    | 24,079           | 41,488             | 2             | 2           | 0           | 1          | Y    | Y   | 9    |
| Zambia    | 21,064           | 16,591             | 2             | 3           | 0           | 1          | Y    | -   | 3    |
| Zimbabwe  | 16,620           | 16,150             | 5             | 6           | 3           | 4          | -    | -   | 3    |

GDP, gross domestic product; IRB, institutional review board; NEC, national ethics committee NPHI, national public health institute; pop., population.

**Appendix 2 Table 6: Funding**

| Country                          | WT             | MRC           | NIH            | CIHR | NHMRC | INSERM | DFG | HHMI | EC           | CDMRP |
|----------------------------------|----------------|---------------|----------------|------|-------|--------|-----|------|--------------|-------|
| Algeria                          | -              | -             | -              | -    | -     | -      | -   | -    | 1,568,955.24 | -     |
| Benin                            | -              | -             | 1,446,653.00   | -    | -     | -      | -   | -    | -            | -     |
| Botswana                         | 184,186.00     | -             | 7,356,998.00   | -    | -     | -      | -   | -    | -            | -     |
| Burkina Faso                     | 39,300.00      | -             | -              | -    | -     | -      | -   | -    | -            | -     |
| Cameroon                         | 133,593.80     | -             | -              | -    | -     | -      | -   | -    | 2,315,190.99 | -     |
| Ivory Coast                      | 9,177,381.85   | -             | -              | -    | -     | -      | -   | -    | -            | -     |
| Democratic Republic of the Congo | 0.00           | -             | 451,242.00     | -    | -     | -      | -   | -    | -            | -     |
| Egypt                            | 0.00           | -             | 384,112.00     | -    | -     | -      | -   | -    | 5,710,715.90 | -     |
| Ethiopia                         | 0.00           | 156,726.38    | 4,045,740.00   | -    | -     | -      | -   | -    | -            | -     |
| Gambia                           | 2,201,155.01   | 93,350,867.24 | 220,300.00     | -    | -     | -      | -   | -    | -            | -     |
| Ghana                            | 6,802,150.11   | -             | 19,915,940.00  | -    | -     | -      | -   | -    | 17,641.05    | -     |
| Kenya                            | 120,959,548.23 | 762,618.20    | 23,965,606.00  | -    | -     | -      | -   | -    | 2,532,293.26 | -     |
| Libya                            | -              | -             | -              | -    | -     | -      | -   | -    | 694,291.15   | -     |
| Madagascar                       | 0.00           | -             | 269,867.00     | -    | -     | -      | -   | -    | -            | -     |
| Malawi                           | 8,620,144.53   | -             | 3,239,240.00   | -    | -     | -      | -   | -    | -            | -     |
| Mali                             | 1,317,039.94   | -             | 7,315,257.00   | -    | -     | -      | -   | -    | -            | -     |
| Morocco                          | -              | -             | -              | -    | -     | -      | -   | -    | 3,357,582.35 | -     |
| Mozambique                       | 0.00           | -             | 14,014,017.00  | -    | -     | -      | -   | -    | -            | -     |
| Namibia                          | 0.00           | -             | -              | -    | -     | -      | -   | -    | -            | -     |
| Nigeria                          | 1,002,984.47   | -             | 34,273,898.00  | -    | -     | -      | -   | -    | 17,641.05    | -     |
| Rwanda                           | 0.00           | -             | 1,539,861.00   | -    | -     | -      | -   | -    | -            | -     |
| Senegal                          | 1,373,601.81   | 1,720,283.81  | -              | -    | -     | -      | -   | -    | 21,006.48    | -     |
| South Africa                     | 77,994,865.15  | 13,302,915.07 | 388,950,849.00 | -    | -     | -      | -   | -    | 2,513,725.77 | -     |
| Sudan                            | 0.00           | -             | -              | -    | -     | -      | -   | -    | -            | -     |
| Tanzania                         | 16,673,318.44  | -             | 4,764,355.00   | -    | -     | -      | -   | -    | -            | -     |
| Tunisia                          | 0.00           | -             | 2,178,511.00   | -    | -     | -      | -   | -    | 7,307,461.63 | -     |
| Uganda                           | 17,943,085.72  | 40,607,133.72 | 35,999,665.00  | -    | -     | -      | -   | -    | 17,641.05    | -     |



**Table 6: Funding**

| Country  | WT           | MRC | NIH           | CIHR | NHMRC | INSERM | DFG | HHMI | EC | CDMRP |
|----------|--------------|-----|---------------|------|-------|--------|-----|------|----|-------|
| Zambia   | 15,720.00    | -   | 13,073,179.00 | -    | -     | -      | -   | -    | -  | -     |
| Zimbabwe | 1,389,486.87 | -   | 21,663,497.00 | -    | -     | -      | -   | -    | -  | -     |

CIHR, Canadian Institutes of Health Research; CDMRP, Congressional Directed Medical Research Programs (Department of Defence); DFG, German Research Foundation (Deutsche Forschungsgemeinschaft); EC, European Commission; HHMI, Howard Hughes Medical Institute; INSERM, Institut national de la santé et de la recherche médicale; MRC, Medical Research Council; NHMRC, National health and Medical Research Council; NIH, National Institutes of Health; WT, Wellcome Trust

\*Cells for CIHR, NHMRC, INSERM, HHMI, CDMRP, DFG are empty because data did not meet inclusion criteria. We excluded funding for research projects in which the principal investigators were based at non-African institutions, even if these projects included collaborators, field sites, or locations of research in Africa.

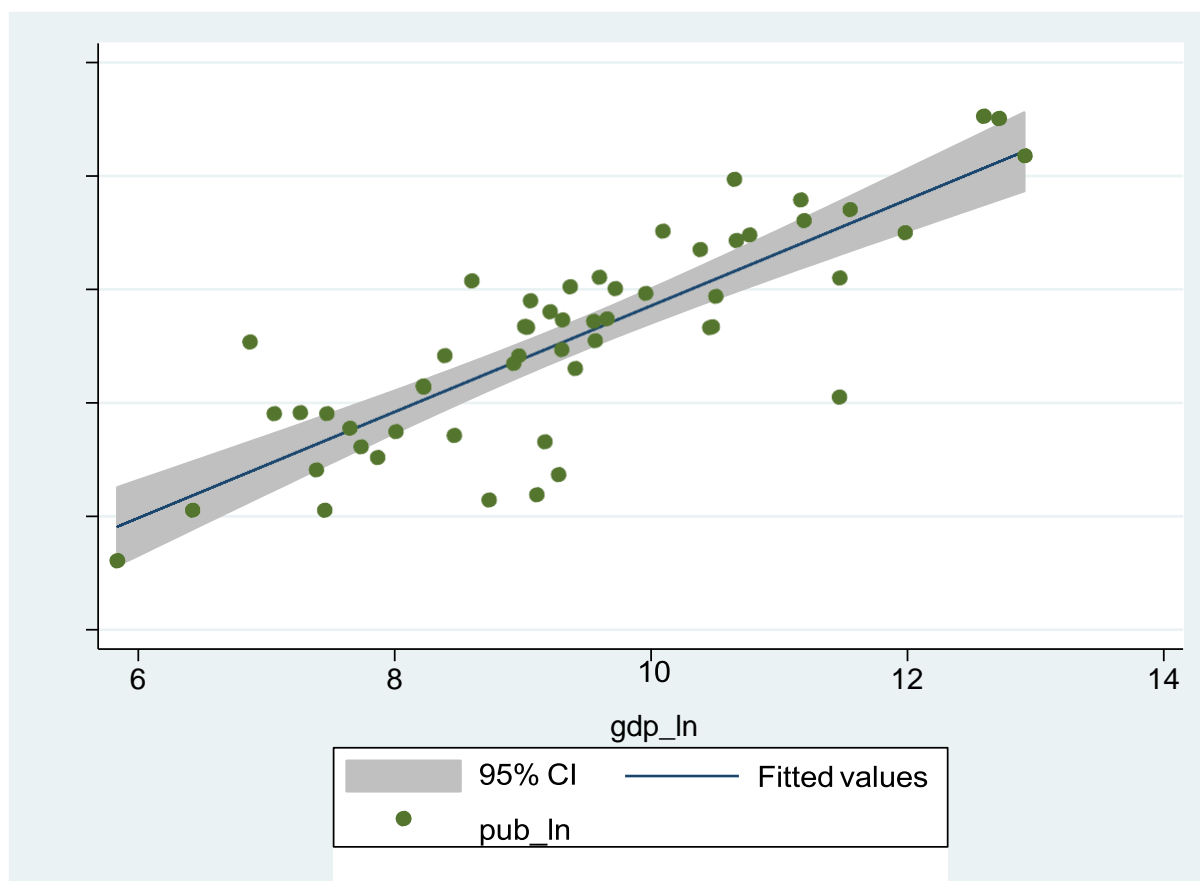

**Appendix 2 Figure 1. The relationship between gross domestic product and publications**

**Note:** Both variables are expressed as natural logs.

**Appendix 2 Table 7. Regression summary for gross domestic product and number of publications**

|                         | (1)<br>pub_ln       |
|-------------------------|---------------------|
| gdp_ln                  | 0.934***<br>(10.52) |
| Constant                | -1.630<br>(-1.93)   |
| Observations            | 54                  |
| R <sup>2</sup>          | 0.680               |
| Adjusted R <sup>2</sup> | 0.674               |

*t* statistics in parentheses

\*  $p < 0.05$ , \*\*  $p < 0.01$ , \*\*\*  $p < 0.001$

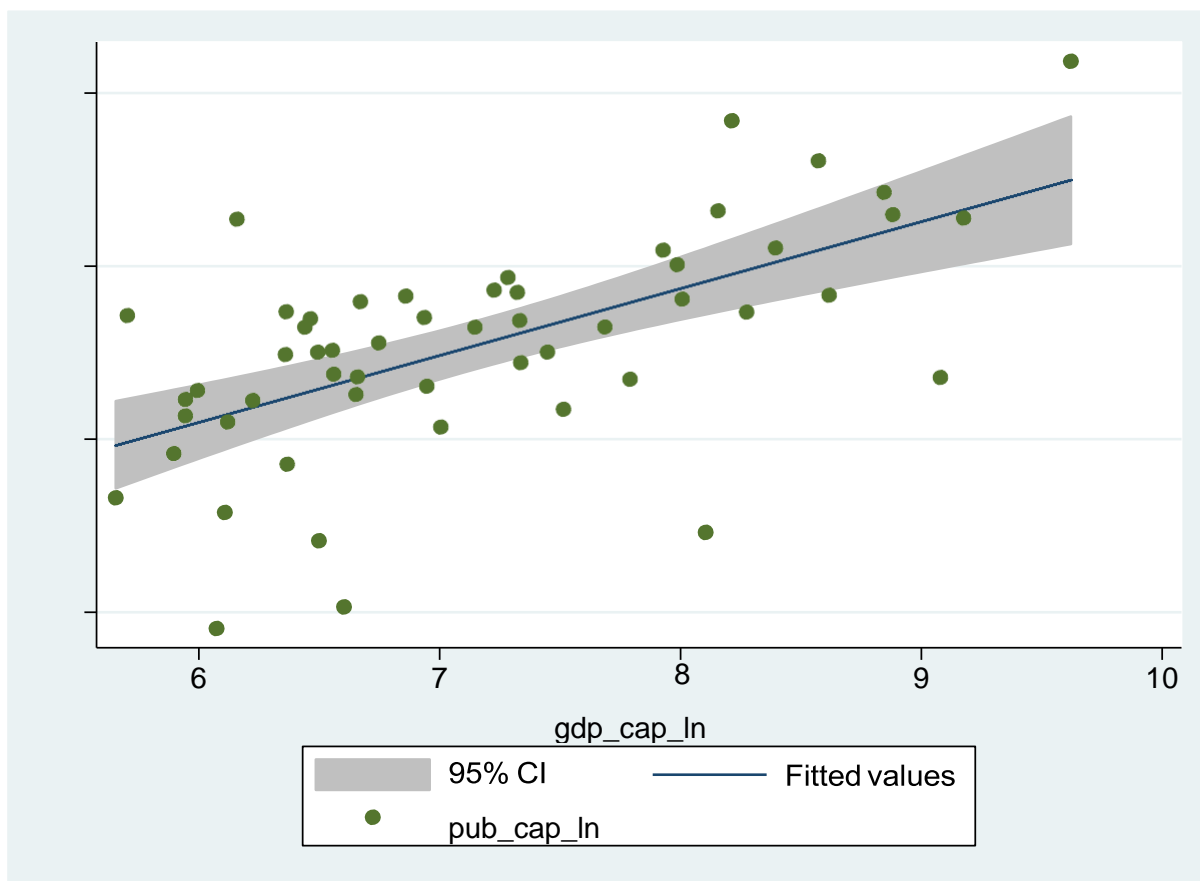

**Appendix 2 Figure 2. The relationship between gross domestic product per capita and publications per capita**

**Note:** Both variables are expressed as natural logs.

**Appendix 2 Table 8.** Regression summary for gross domestic product per capita and the number of publications per capita

|                         | (1)<br>pub_cap_ln     |
|-------------------------|-----------------------|
| gdp_cap_ln              | 0.771***<br>(5.56)    |
| Constant                | -14.42***<br>(-14.39) |
| Observations            | 54                    |
| R <sup>2</sup>          | 0.373                 |
| Adjusted R <sup>2</sup> | 0.361                 |

*t* statistics in parentheses

\*  $p < 0.05$ , \*\*  $p < 0.01$ , \*\*\*  $p < 0.001$

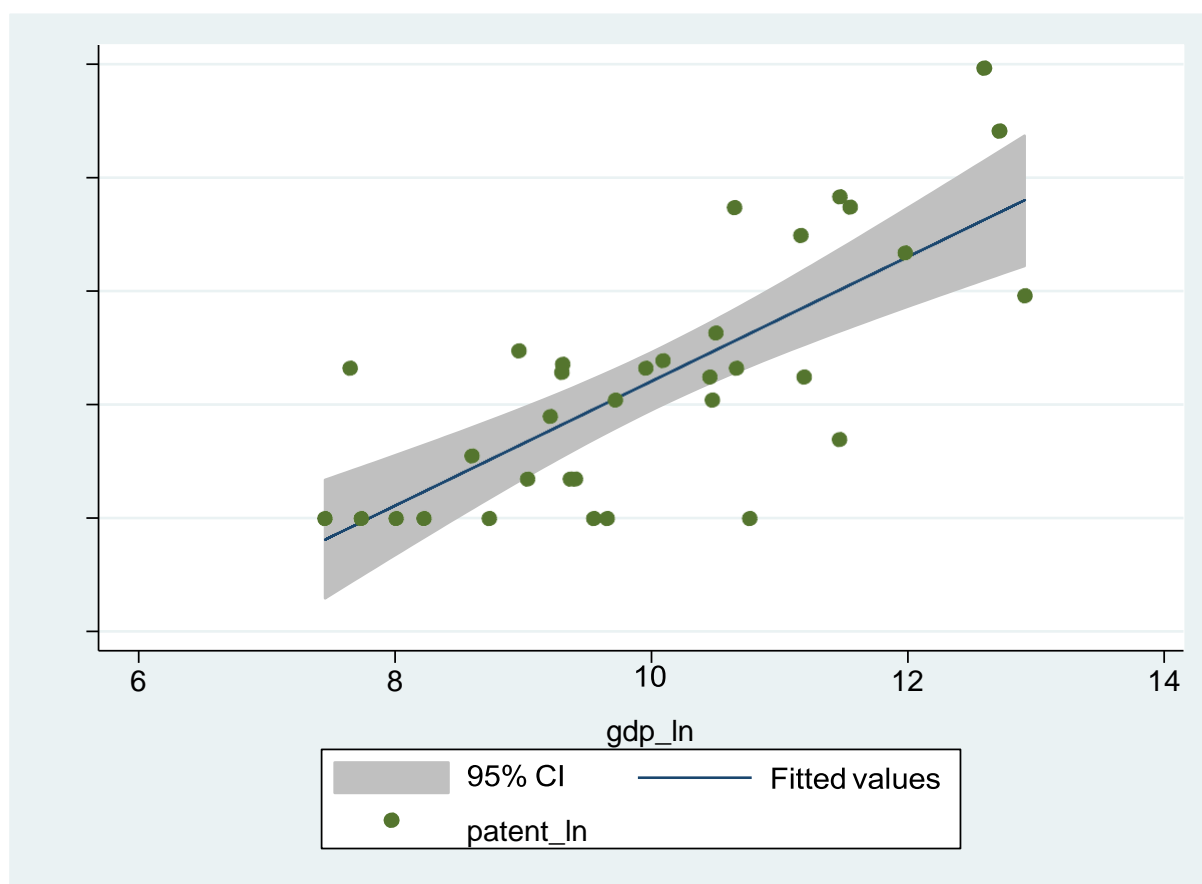

**Appendix 2 Figure 3. The relationship between gross domestic product and patent applications**

**Note:** Both variables are expressed as natural logs.

**Appendix 2 Table 9.** Regression summary for gross domestic product and patent applications

|                         | (1)<br>patent_ln     |
|-------------------------|----------------------|
| gdp_ln                  | 1.093***<br>(6.27)   |
| Constant                | -8.519***<br>(-4.83) |
| Observations            | 34                   |
| R <sup>2</sup>          | 0.551                |
| Adjusted R <sup>2</sup> | 0.537                |

*t* statistics in parentheses

\*  $p < 0.05$ , \*\*  $p < 0.01$ , \*\*\*  $p < 0.001$

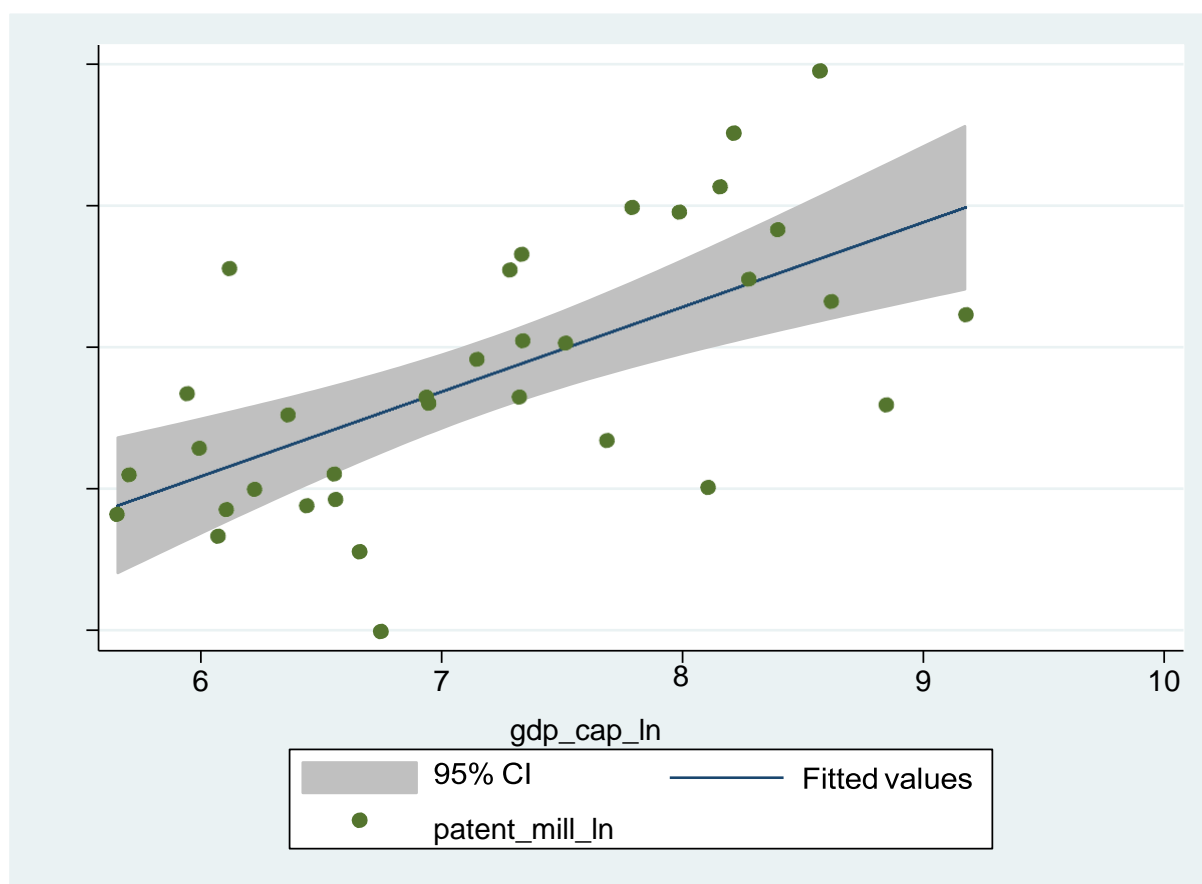

**Appendix 2 Figure 4. The relationship between gross domestic product per capita and patent applications per capita**

**Note:** Both variables are expressed as natural logs.

**Appendix 2 Table 10.** Regression summary for gross domestic product per capita and patent applications per capita

| (1)<br>patent_mill_ln              |                      |
|------------------------------------|----------------------|
| gdp_cap_ln                         | 1.196***<br>(4.65)   |
| Constant                           | -8.996***<br>(-4.81) |
| Observations                       | 34                   |
| R <sup>2</sup>                     | 0.403                |
| Adjusted R <sup>2</sup>            | 0.384                |
| <i>t</i> statistics in parentheses |                      |

\*  $p < 0.05$ , \*\*  $p < 0.01$ , \*\*\*  $p < 0.001$

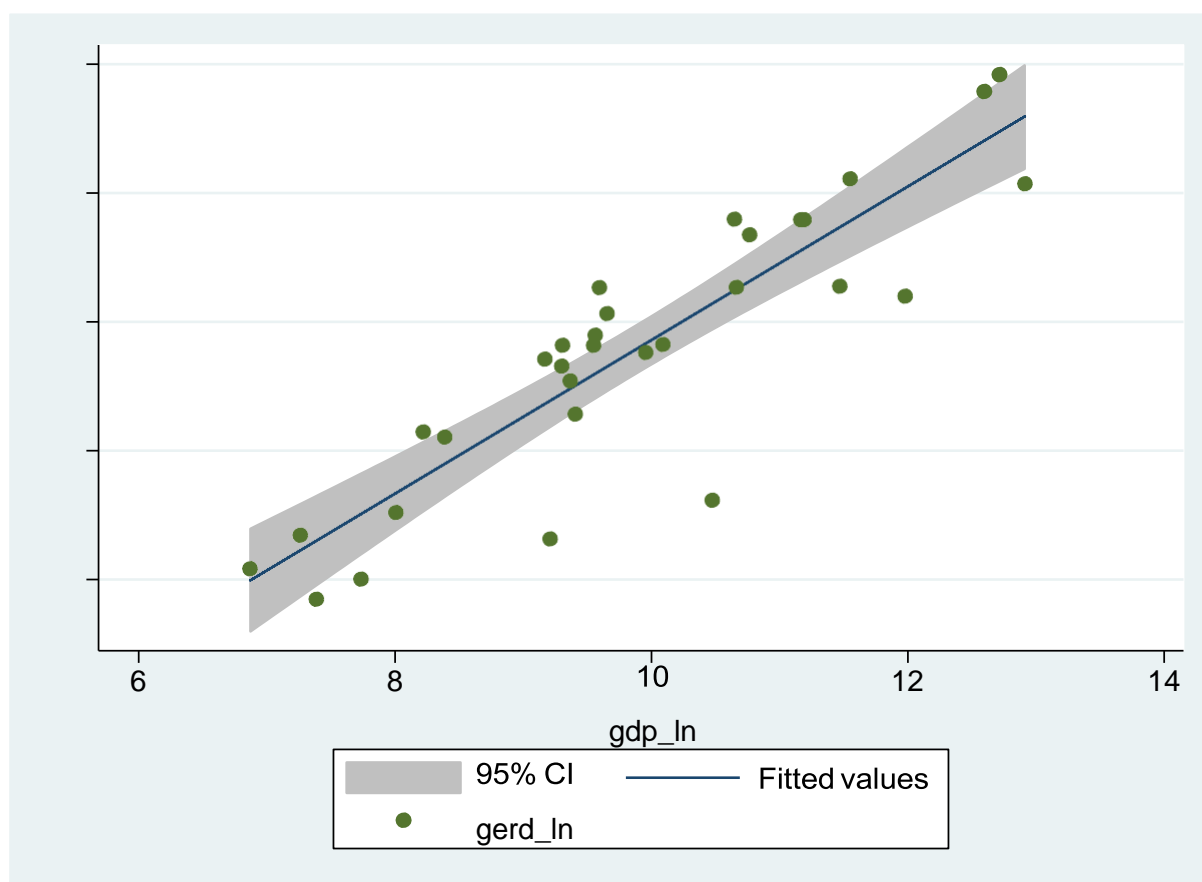

**Appendix 2 Figure 5. The relationship between gross domestic product and GERD**

**Note:** Both variables are expressed as natural logs.

**Appendix 2 Table 11.** Regression summary for gross domestic product and GERD

| (1)<br>gerd_ln                     |                     |
|------------------------------------|---------------------|
| gdp_ln                             | 1.190***<br>(10.38) |
| Constant                           | -0.188<br>(-0.16)   |
| Observations                       | 31                  |
| R <sup>2</sup>                     | 0.788               |
| Adjusted R <sup>2</sup>            | 0.781               |
| <i>t</i> statistics in parentheses |                     |

\*  $p < 0.05$ , \*\*  $p < 0.01$ , \*\*\*  $p < 0.001$

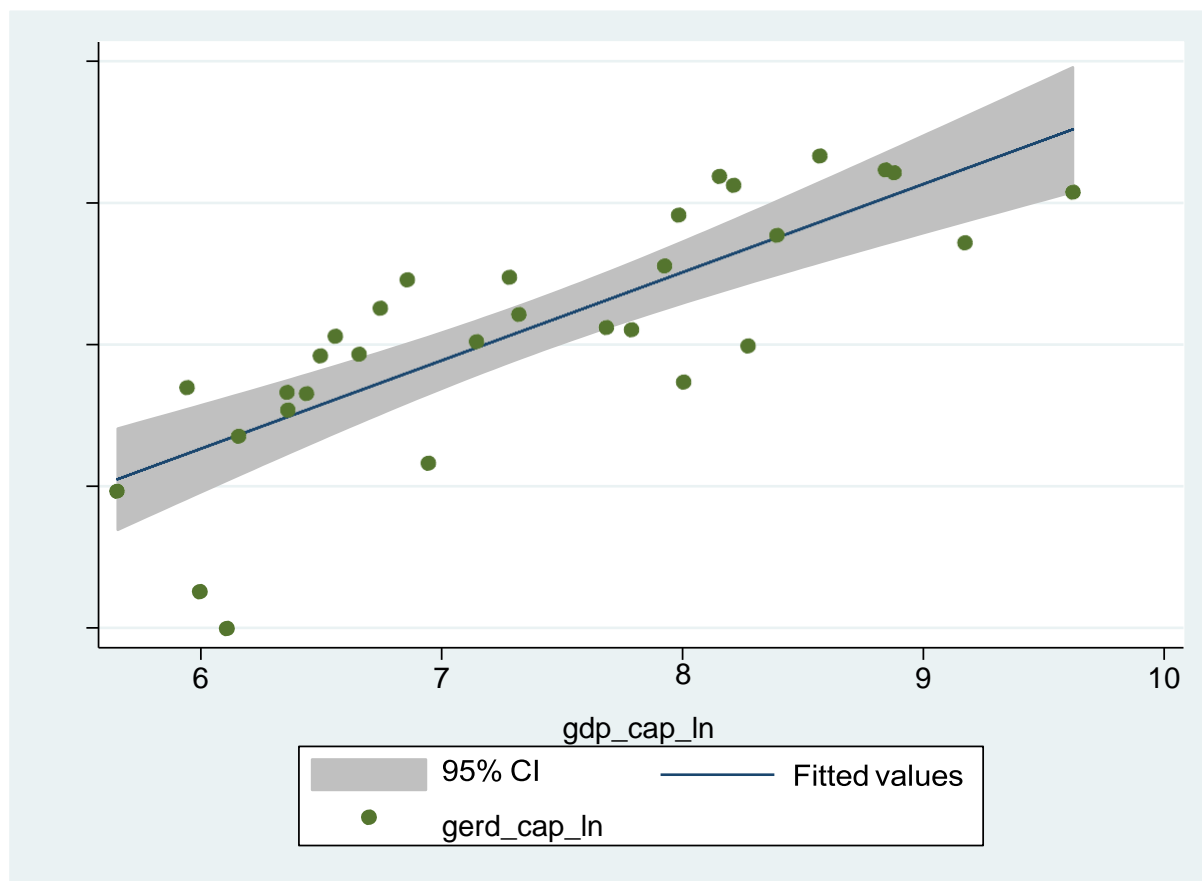

**Appendix 2 Figure 6. The relationship between gross domestic product per capita and GERD per capita**

**Note:** Both variables are expressed as natural logs.

**Appendix 2 Table 12.** Regression summary for gross domestic product per capita and GERD per capita

| (1)                     |                      |
|-------------------------|----------------------|
| gerd_cap_ln             |                      |
| gdp_cap_ln              | 1.244***<br>(7.17)   |
| Constant                | -6.935***<br>(-5.37) |
| Observations            | 31                   |
| R <sup>2</sup>          | 0.639                |
| Adjusted R <sup>2</sup> | 0.627                |

*t* statistics in parentheses

\*  $p < 0.05$ , \*\*  $p < 0.01$ , \*\*\*  $p < 0.001$

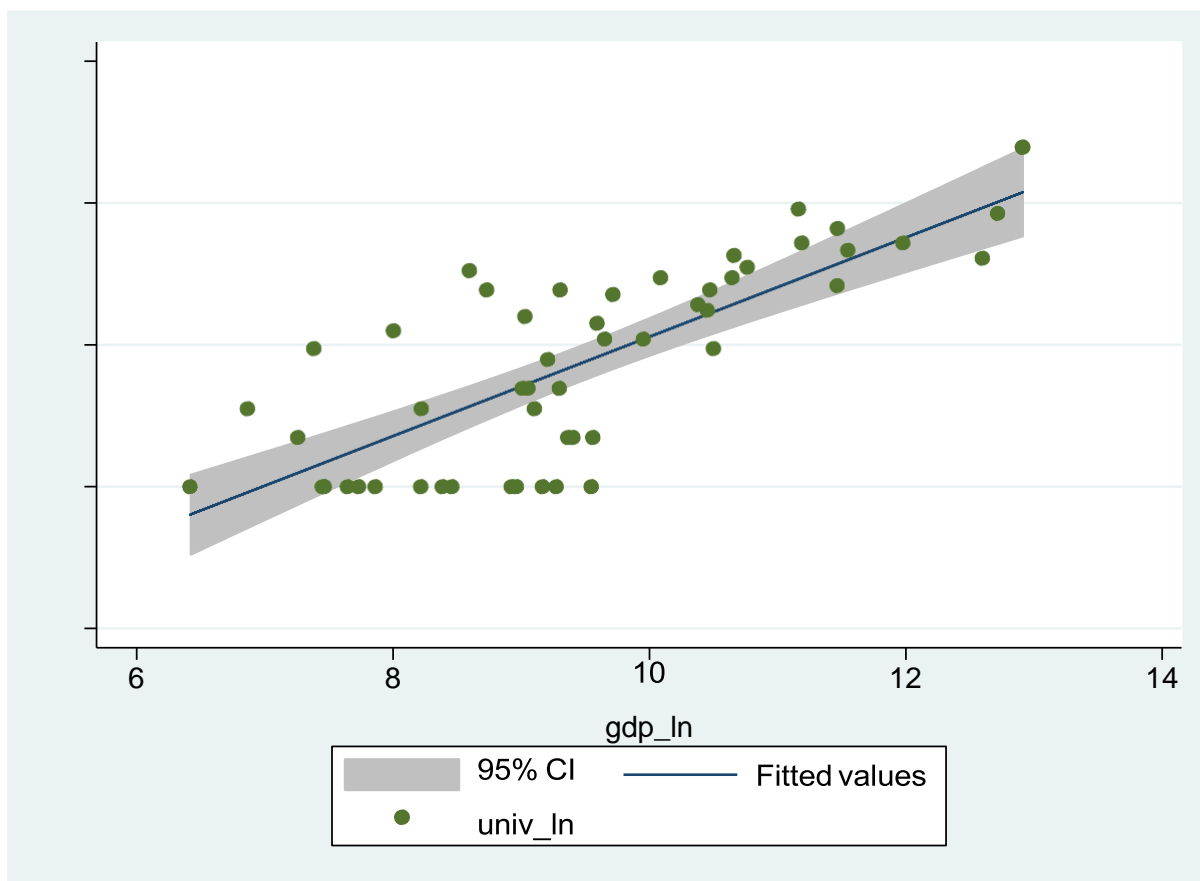

**Appendix 2 Figure 7. The relationship between gross domestic product and universities**

**Note:** Both variables are expressed as natural logs.

**Appendix 2 Table 13.** Regression summary for gross domestic product and universities

|                         | (1)<br>univ_ln       |
|-------------------------|----------------------|
| gdp_ln                  | 0.700***<br>(8.55)   |
| Constant                | -4.893***<br>(-6.22) |
| Observations            | 52                   |
| R <sup>2</sup>          | 0.594                |
| Adjusted R <sup>2</sup> | 0.586                |

*t* statistics in parentheses

\*  $p < 0.05$ , \*\*  $p < 0.01$ , \*\*\*  $p < 0.001$



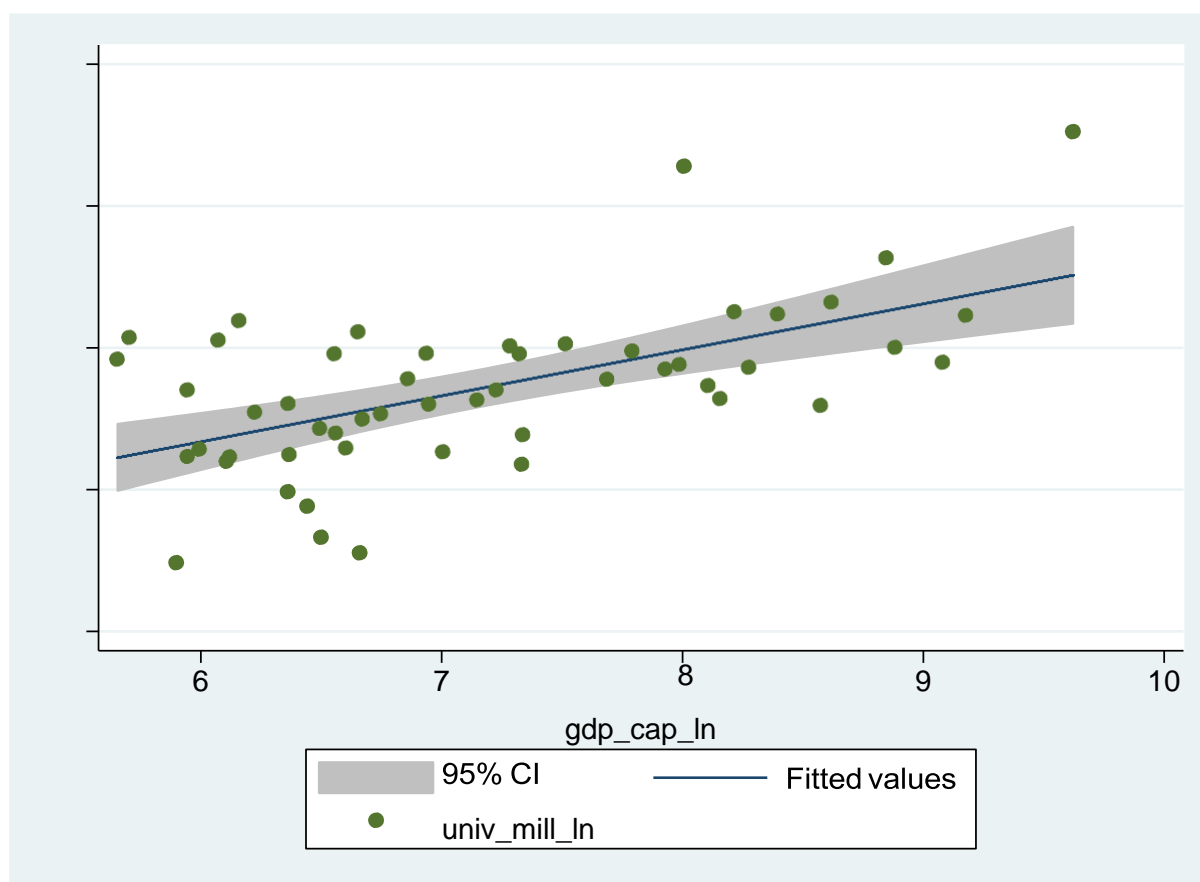

**Appendix 2 Figure 8. The relationship between gross domestic product per capita and universities per capita**

**Note:** Both variables are expressed as natural logs.

**Appendix 2 Table 14.** Regression summary for gross domestic product per capita and universities per capita

| (1)<br>univ_mill_ln |                      |
|---------------------|----------------------|
| gdp_cap_ln          | 0.648***<br>(5.06)   |
| Constant            | -5.207***<br>(-5.62) |
| Observations        | 52                   |
| $R^2$               | 0.339                |
| Adjusted $R^2$      | 0.326                |

*t* statistics in parentheses

\*  $p < 0.05$ , \*\*  $p < 0.01$ , \*\*\*  $p < 0.001$

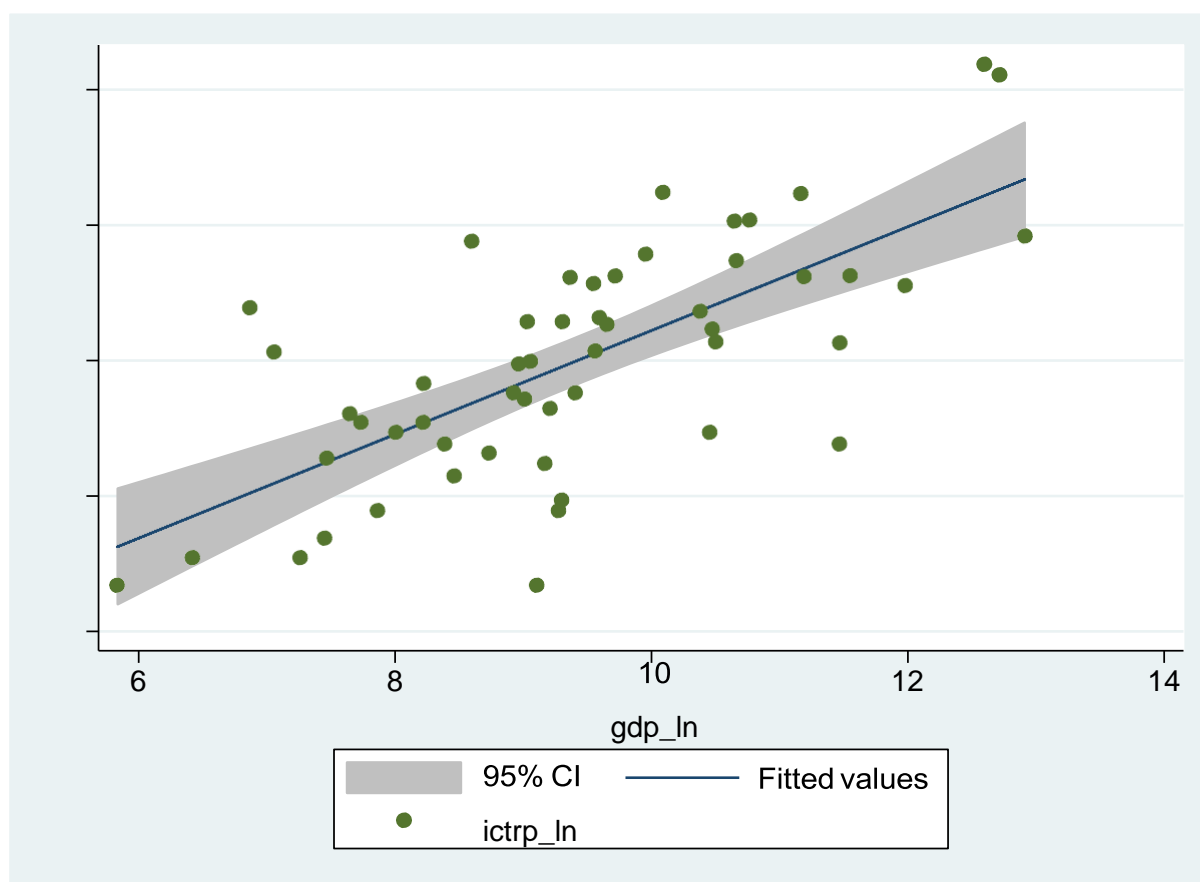

**Appendix 2 Figure 9. The relationship between gross domestic product and clinical trials**

**Note:** Both variables are expressed as natural logs.

**Appendix 2 Table 15.** Regression summary for gross domestic product and clinical trials

|                         | (1)<br>ictrp_ln     |
|-------------------------|---------------------|
| gdp_ln                  | 0.765***<br>(7.03)  |
| Constant                | -3.212**<br>(-3.09) |
| Observations            | 53                  |
| R <sup>2</sup>          | 0.492               |
| Adjusted R <sup>2</sup> | 0.482               |

*t* statistics in parentheses

\*  $p < 0.05$ , \*\*  $p < 0.01$ , \*\*\*  $p < 0.001$

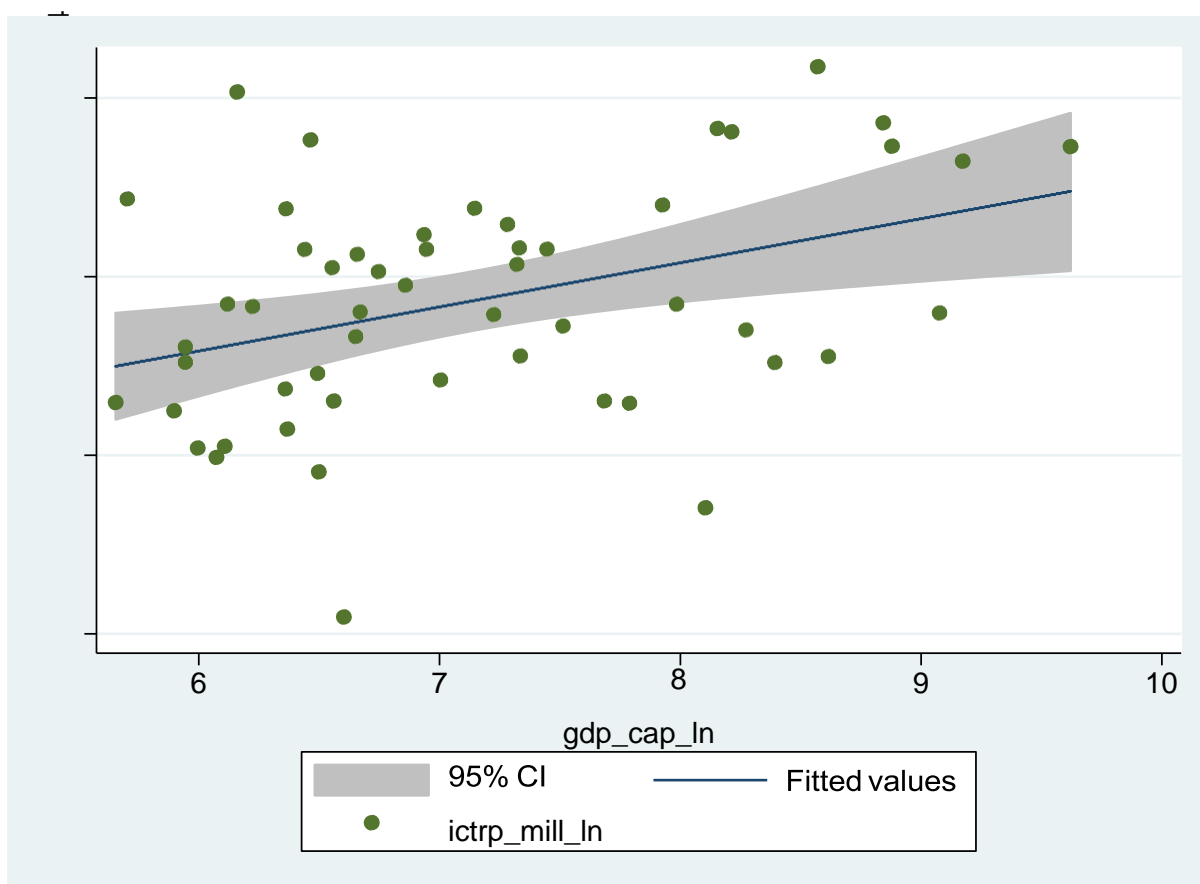

**Appendix 2 Figure 10. The relationship between gross domestic product per capita and clinical trials per capita**

**Note:** Both variables are expressed as natural logs.

**Appendix 2 Table 16.** Regression summary for gross domestic product per capita and clinical trials per capita

|                         | (1)<br>ictrp_mill_<br>ln |
|-------------------------|--------------------------|
| gdp_cap_ln              | 0.492**<br>(2.98)        |
| Constant                | -1.789<br>(-1.50)        |
| Observations            | 53                       |
| R <sup>2</sup>          | 0.149                    |
| Adjusted R <sup>2</sup> | 0.132                    |

*t* statistics in parentheses

\* *p* < 0.05, \*\* *p* < 0.01, \*\*\* *p* < 0.001
